# Supplementary material
Source: Springer Nature journal article supplement (https://www.springermedizin.de/resource/supplementary/12885_2011_2841_MOESM4_ESM.pdf/9462164)

## Collagen

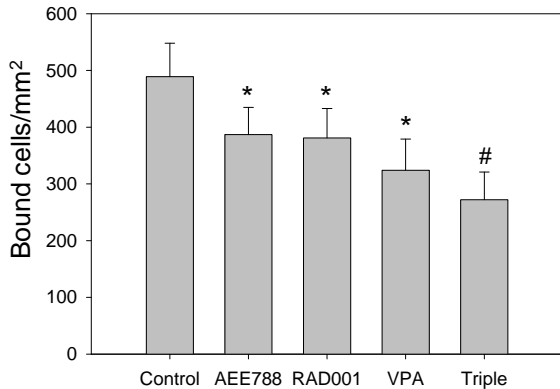

## Fibronectin

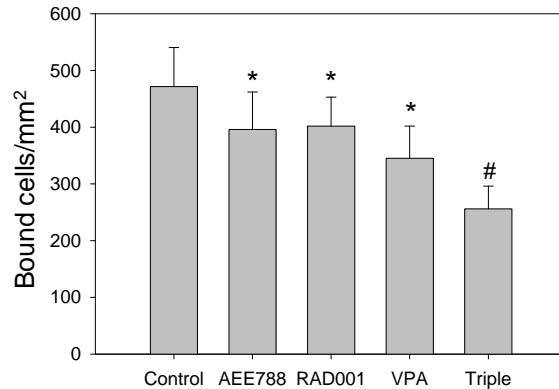

## Laminin

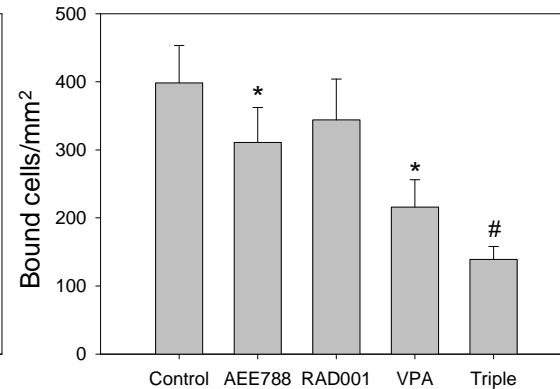

PC-3

DU-145

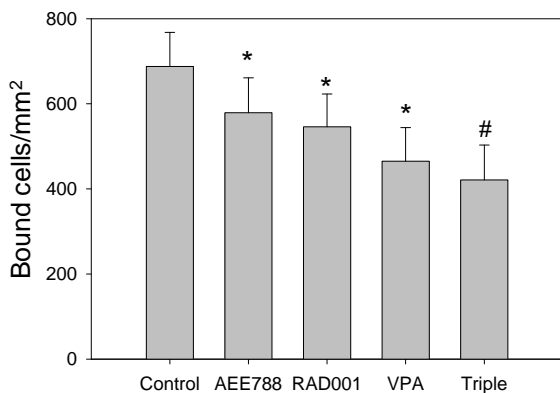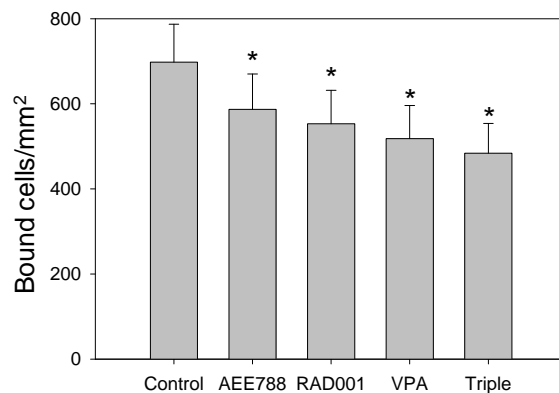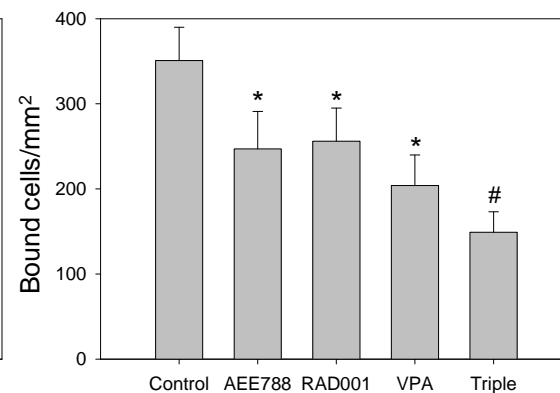

LNCaP

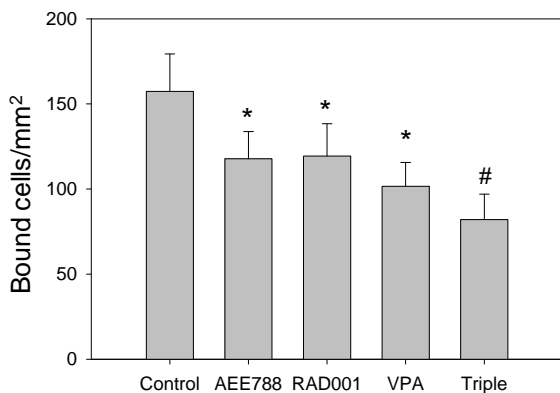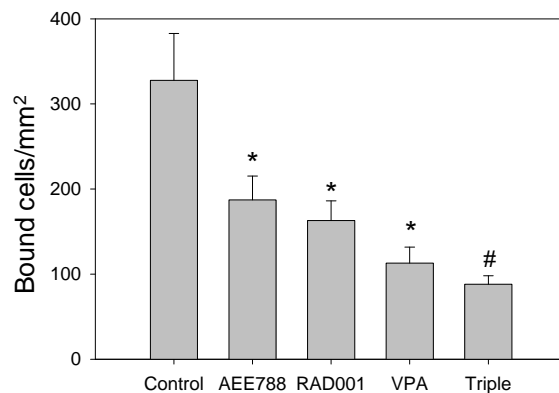

Supplement: MOESM4 [file 9462164]
